# Supplementary material
Source: PubMed Central journal article supplement (PMC5915209)
Supplement: EHP1136.s001.acco.pdf [file EHP1136.s001.acco.pdf]

**Note to readers with disabilities:** *EHP* strives to ensure that all journal content is accessible to all readers. However, some figures and Supplemental Material published in *EHP* articles may not conform to [508 standards](#) due to the complexity of the information being presented. If you need assistance accessing journal content, please contact [ehp508@niehs.nih.gov](mailto:ehp508@niehs.nih.gov). Our staff will work with you to assess and meet your accessibility needs within 3 working days.

### **Supplemental Material**

#### **Exposure to road, railway, and aircraft noise and arterial stiffness in the SAPALDIA study: annual average noise levels and temporal noise characteristics**

Maria Foraster, Ikenna C. Eze, Emmanuel Schaffner, Danielle Vienneau, Harris Héritier, Simon Endes, Franziska Rudzik, Laurie Thiesse, Reto Pieren, Christian Schindler, Arno Schmidt-Trucksäss, Mark Brink, Christian Cajochen, Jean Marc Wunderli, Martin Rössli, Nicole Probst-Hensch

#### **Table of Contents**

**Table S1.** Spearman rank correlations among brachial-ankle pulse wave velocity (baPWV) and the different residential outdoor noise indicators and air pollutant variables, n=2775.

**Table S2.** Study characteristics in the study sample (n=2775) compared to the baseline samples and additional study characteristics.

**Table S3.** Associations of annual average transportation noise levels (Lden) and total noise intermittency ratio (IR) with arterial stiffness, expressed per 10 dB or 10 % change in IR, respectively, instead of IQRs (n=2775).

**Table S4.** Association of annual average transportation noise levels (Lden), total day-time noise intermittency ratio (IR<sub>day</sub>), and total number of day-time noise events (NE<sub>day</sub>) with arterial stiffness (n=2775).

**Table S5.** Sensitivity analyses for the association between annual average transportation noise levels (Lden) and arterial stiffness (baPWV) applying inverse probability weighting for participation selection bias, or excluding non-movers, or participants with hearing impairment, or with CVD.

**Table S6.** Median source-specific noise levels and interquartile ranges in the entire sample, and percentage of noise exposed by groups of potential effect modifiers (n=2775).

**Table S7.** Source-specific noise levels for participants exposed to railway noise levels (n=1237, 44.6%) and by intermittency ratio category.

**Figure S1.** Association between annual average railway noise levels (Lden) and arterial stiffness (baPWV) across different model adjustments. All linear mixed models included a random intercept by study area and the noise truncation indicators. Dot: % change in baPWV per IQR change in Lden (8.1 dB); spikes: 95% confidence interval. M=model (sample size). BMI: Body Mass Index, NO<sub>2</sub>: Nitrogen dioxide, PM<sub>2.5</sub>: particulate matter levels of 2.5 μm; CVD: Cardiovascular Disease.

**Figure S2.** Distribution of the main noise and air pollution indicators in the study sample.

**Figure S3.** Thin plate penalized smoothing splines for the association between annual average transportation noise levels (Lden) and arterial stiffness (baPWV), per 1 dB. Generalized additive models were adjusted for the complementary Lden sources, their noise truncation indicators, and sex, age, sex×age, education, smoking status, pack-years smoked, secondary smoke, alcohol consumption, diet, body mass index (BMI), BMI<sub>2</sub>, physical activity, mean arterial pressure (MAP), MAP×sex, nitrogen dioxide, and a random intercept by study area.

Table S1. Spearman rank correlations among brachial-ankle pulse wave velocity (baPWV) and the different residential outdoor noise indicators and air pollutant variables, n=2775.

|                                                     | baPWV  | Lden, air | Lden, rail | Lden, road | Lday, air | Lday, rail | Lday, road | Lnight, air | Lnight, rail | Lnight, road | IR day, all | IR night, all | NE day | NE night, all | NO <sub>2</sub> |
|-----------------------------------------------------|--------|-----------|------------|------------|-----------|------------|------------|-------------|--------------|--------------|-------------|---------------|--------|---------------|-----------------|
| baPWV                                               | 1.00** |           |            |            |           |            |            |             |              |              |             |               |        |               |                 |
| Lden <sup>a</sup> , aircraft (dB)                   | 0      | 1.00**    |            |            |           |            |            |             |              |              |             |               |        |               |                 |
| Lden <sup>a</sup> , rail (dB)                       | 0.04*  | 0.13**    | 1.00**     |            |           |            |            |             |              |              |             |               |        |               |                 |
| Lden <sup>a</sup> , road (dB)                       | -0.01  | -0.03     | 0.02       | 1.00**     |           |            |            |             |              |              |             |               |        |               |                 |
| Lday <sup>b</sup> , aircraft                        | 0      | 0.92**    | 0.16**     | -0.05**    | 1.00**    |            |            |             |              |              |             |               |        |               |                 |
| Lday <sup>b</sup> , rail                            | 0.03*  | 0.09**    | 0.92**     | 0.01       | 0.11**    | 1.00**     |            |             |              |              |             |               |        |               |                 |
| Lday <sup>b</sup> , road                            | -0.01  | -0.03     | 0.02       | 1.00**     | -0.05**   | 0.01       | 1.00**     |             |              |              |             |               |        |               |                 |
| Lnight <sup>c</sup> , aircraft                      | -0.01  | 0.55**    | -0.06**    | 0.06**     | 0.33**    | -0.07**    | 0.06**     | 1.00**      |              |              |             |               |        |               |                 |
| Lnight <sup>c</sup> , rail                          | 0.04** | 0.15**    | 0.98**     | 0.01       | 0.18**    | 0.89**     | 0.01       | -0.05**     | 1.00**       |              |             |               |        |               |                 |
| Lnight <sup>c</sup> , road                          | -0.01  | -0.03     | 0.02       | 1.00**     | -0.05**   | 0.02       | 1.00**     | 0.06**      | 0.02         | 1.00**       |             |               |        |               |                 |
| IR <sup>d</sup> day                                 | -0.01  | 0.07**    | 0.03       | -0.06**    | 0.04**    | 0.05**     | -0.06**    | -0.14**     | 0.03         | -0.07**      | 1.00**      |               |        |               |                 |
| IR <sup>d</sup> night (%)                           | 0      | -0.01     | 0.11**     | 0.11**     | -0.04**   | 0.14**     | 0.11**     | -0.15**     | 0.11**       | 0.10**       | 0.88**      | 1.00**        |        |               |                 |
| NE <sup>e</sup> day                                 | 0      | -0.03     | -0.05**    | 0.77**     | -0.05**   | -0.05**    | 0.77**     | 0.04**      | -0.06**      | 0.77**       | -0.06**     | 0.22**        | 1.00** |               |                 |
| NE <sup>e</sup> night (n)                           | -0.01  | -0.03     | -0.05**    | 0.67**     | -0.03     | -0.05**    | 0.67**     | 0.06**      | -0.06**      | 0.66**       | -0.52**     | -0.28**       | 0.80** | 1.00**        |                 |
| NO <sub>2</sub> <sup>f</sup> (µg/m <sup>3</sup> )   | 0.02   | -0.02     | 0.21**     | 0.42**     | 0.08**    | 0.17**     | 0.42**     | 0.03        | 0.23**       | 0.42**       | -0.29**     | -0.19**       | 0.30** | 0.39**        | 1.00**          |
| PM <sub>2.5</sub> <sup>g</sup> (µg/m <sup>3</sup> ) | 0.03*  | 0.24**    | 0.08**     | 0.23**     | 0.31**    | 0.03       | 0.23**     | 0.19**      | 0.10**       | 0.23**       | -0.36**     | -0.33**       | 0.13** | 0.28**        | 0.58**          |

\*p-value < 0.1, \*\*p-value < 0.05; <sup>a</sup> Annual average noise levels for the 24h with + 5 dB and + 10dB penalties for the evening and night (dB); <sup>b</sup> Annual average noise levels for the day-time (7am-11pm) (dB); <sup>c</sup> Annual average noise levels for the night-time (11pm-7am) (dB); <sup>d</sup> Total noise intermittency ratio (%); <sup>e</sup> Total number of noise events (number); <sup>f</sup> 2-y average nitrogen dioxide levels (µg/m<sup>3</sup>), <sup>g</sup> 2-y average particulate matter levels of 2.5 µm (µg/m<sup>3</sup>).

Table S2. Study characteristics in the study sample (n=2775) compared to the baseline samples and additional study characteristics.

| Variables                                           | Excluded<br>(n=293) | Included<br>(n=2775)     | baPWV<br>sample<br>≥ 50 years<br>(n=3086) | All SAP3<br>≥ 50 years<br>(n=4832) | All SAP3<br>(n=6088)     |
|-----------------------------------------------------|---------------------|--------------------------|-------------------------------------------|------------------------------------|--------------------------|
| <i>Continuous variables [p50 (IQR)<sup>a</sup>]</i> |                     |                          |                                           |                                    |                          |
| baPWV (m/s)                                         | 13.7 (3.2)          | 13.4 (3.1)               | 13.5 (3.1)                                | -                                  | -                        |
| Lden <sup>b</sup> , road (dB)                       | 53.4 (10.4)         | 54.2 (10.6)              | 54.0 (10.6)                               | 54.3 (10.7)                        | 54.1 (10.8)              |
| Lden <sup>b</sup> , railway (dB)                    | 30.0 (8.0)          | 30.0 (8.1)               | 30.0 (8.1)                                | 30.0 (8.0)                         | 30.0 (7.8)               |
| Lden <sup>b</sup> , aircraft (dB)                   | 31.5 (7.5)          | 32.8 (8.0)               | 32.5 (7.9)                                | 33.9 (8.3)                         | 33.9 (8.5)               |
| IR <sup>c</sup> night (%)                           | 74.0 (31.9)         | 73.1 (27.2)              | 73.2 (27.4)                               | 73.2 (27.2)                        | 73.0 (26.9)              |
| NE <sup>d</sup> night (n)                           | 118 (171)           | 123 (179)                | 123 (177)                                 | 125 (181)                          | 125 (178)                |
| Lnight <sup>e</sup> , road (dB)                     | 44.5 (10.5)         | 45.3 (10.5)              | 45.3 (10.6)                               | 45.4 (10.7)                        | 45.3 (10.8)              |
| Lnight <sup>e</sup> , rail (dB)                     | 20.6 (10.9)         | 20.0 (10.9)              | 20.0 (10.9)                               | 20.0 (10.9)                        | 20.0 (10.7)              |
| Lnight <sup>e</sup> , aircraft (dB)                 | 20.0 (3.8)          | 20.0 (4.0)               | 20.0 (3.9)                                | 20.0 (4.3)                         | 20.0 (4.5)               |
| IR <sup>c</sup> day (%)                             | 68.2 (47.0)         | 63.8 (40.3)              | 64.2 (40.6)                               | 63.4 (40.5)                        | 63.4 (40.3)              |
| NE <sup>d</sup> day (n)                             | 421(752)            | 433 (870)                | 432 (862)                                 | 447 (877)                          | 440 (870)                |
| Lday <sup>f</sup> , road (dB)                       | 51.8 (10.7)         | 52.5 (10.7)              | 52.4 (10.6)                               | 52.6 (10.7)                        | 52.5 (10.8)              |
| Lday <sup>f</sup> , rail (dB)                       | 30.0 (3.3)          | 30.0 (3.4)               | 30.0 (3.3)                                | 30.0 (3.3)                         | 30.0 (3.1)               |
| Lday <sup>f</sup> , aircraft (dB)                   | 30.0 (6.6)          | 30.0 (7.0)               | 30.0 (7.0)                                | 30.0 (7.5)                         | 30.0 (7.7)               |
| Nitrogen dioxide (µg/m <sup>3</sup> )               | 16.5 (9.2)          | 17.3 (10.5)              | 17.2 (10.3)                               | 17.6 (10.8)                        | 17.2 (10.1)              |
| Age (years)                                         | 63.6 (14.6)         | 63.2 (12.3)              | 63.3 (12.6)                               | 63.6 (13.9)                        | 60.3 (17.8)              |
| Pack-years smoked                                   | 0.0 (20.4)          | 1.0 (20.5)               | 1.0 (20.4) <sup>g</sup>                   | 1.0 (21.0) <sup>h</sup>            | 0.5 (18.5) <sup>h</sup>  |
| Body mass index (kg/m <sup>2</sup> )                | 26.4 (5.6)          | 25.9 (5.6)               | 26.0 (5.6)                                | 26.1 (5.8) <sup>h</sup>            | 25.8 (5.7) <sup>h</sup>  |
| Mean blood pressure (mmHg)                          | 96.8 (15.2)         | 97.5 (16.0)              | 97.5 (15.8)                               | 97.3 (15.8) <sup>h</sup>           | 96.3 (15.7) <sup>h</sup> |
| Noise sensitivity score (n)                         | 29.0 (16.0)         | 32.0 (16.0) <sup>h</sup> | 31.0 (16.0) <sup>h</sup>                  | 32.0 (16.0) <sup>i</sup>           | 32.0 (16.0) <sup>i</sup> |
| Daytime sleepiness score (n)                        | 14.0 (5.0)          | 14.0 (5.0)               | 14.0 (5.0) <sup>g</sup>                   | 14.0 (5.0) <sup>h</sup>            | 14.0 (5.0) <sup>h</sup>  |
| <i>Categorical variables [n (%)]</i>                |                     |                          |                                           |                                    |                          |
| Sex, Women                                          | 113 (38.6)          | 1417 (51.1)              | 1530 (49.9)                               | 2576 (53.3)                        | 3191 (52.4)              |
| Education, Low                                      | 25 (8.6)            | 169 (6.1)                | 194 (6.3)                                 | 383 (7.9)                          | 414 (6.8)                |
| Middle                                              | 185 (63.4)          | 1817 (65.5)              | 2002 (65.3)                               | 3198 (66.2)                        | 3980 (65.4)              |
| High                                                | 82 (28.1)           | 789 (28.4)               | 871 (28.4)                                | 1249 (25.9)                        | 1692 (27.8)              |
| Smoking, Never                                      | 105 (35.8)          | 1175 (42.3)              | 1280 (41.7)                               | 2003 (41.6)                        | 2646 (43.6)              |
| Former                                              | 142 (48.5)          | 1140 (41.1)              | 1282 (41.8)                               | 1974 (41.0)                        | 2306 (38.0)              |
| Current                                             | 46 (15.7)           | 460 (16.6)               | 506 (16.5)                                | 836 (17.4)                         | 1113 (18.4)              |
| Second-hand smoking, Yes                            | 31 (10.7)           | 330 (11.9)               | 361 (11.8)                                | 599 (12.6) <sup>g</sup>            | 808 (13.5) <sup>g</sup>  |
| Alcohol consumption, Yes                            | 131 (52.8)          | 1286 (46.3)              | 1417 (46.9) <sup>g</sup>                  | 1793 (45.1) <sup>h</sup>           | 2130 (42.2) <sup>h</sup> |
| Moderate physical activity, ≥ 150min/week           | 131 (59.5)          | 1648 (59.4)              | 1779 (59.4) <sup>g</sup>                  | 2259 (57.5) <sup>h</sup>           | 2798 (56.0) <sup>h</sup> |
| Raw vegetables, ≥ 5 days/week                       | 160 (65.3)          | 2013 (72.5)              | 2173 (72.0) <sup>g</sup>                  | 2825 (71.1) <sup>h</sup>           | 3550 (70.3) <sup>h</sup> |
| Cooked vegetables, ≥ 5 days/week                    | 130 (52.8)          | 1586 (57.2)              | 1716 (56.8) <sup>g</sup>                  | 2274 (57.2) <sup>h</sup>           | 2841 (56.3) <sup>h</sup> |
| Fish, ≥ 1 day/week                                  | 165 (67.6)          | 1889 (68.1)              | 2054 (68.0) <sup>g</sup>                  | 2704 (68.0) <sup>h</sup>           | 3363 (66.6) <sup>h</sup> |
| Area, Basel                                         | 39 (13.3)           | 329 (11.9)               | 368 (12.0)                                | 620 (12.8)                         | 814 (13.4)               |
| Wald                                                | 47 (16.0)           | 484 (17.4)               | 531 (17.3)                                | 893 (18.5)                         | 1117 (18.3)              |

Table S2. Continued.

| Variables                            | Excluded<br>(n=293)     | Included<br>(n=2775) | baPWV<br>sample<br>≥ 50 years<br>(n=3086) | All SAP3<br>≥ 50 years<br>(n=4832) | All SAP3<br>(n=6088)     |
|--------------------------------------|-------------------------|----------------------|-------------------------------------------|------------------------------------|--------------------------|
| <i>Categorical variables [n (%)]</i> |                         |                      |                                           |                                    |                          |
| Davos                                | 32 (10.9)               | 289 (10.4)           | 321 (10.5)                                | 448 (9.3)                          | 511 (8.4)                |
| Lugano                               | 43 (14.7)               | 357 (12.9)           | 400 (13.0)                                | 645 (13.3)                         | 769 (12.6)               |
| Montana                              | 31 (10.6)               | 307 (11.1)           | 338 (11.0)                                | 420 (8.7)                          | 565 (9.3)                |
| Payerne                              | 32 (10.9)               | 350 (12.6)           | 382 (12.5)                                | 674 (13.9)                         | 878 (14.4)               |
| Aarau                                | 56 (19.1)               | 457 (16.5)           | 513 (16.7)                                | 705 (14.6)                         | 905 (14.9)               |
| Geneva                               | 13 (4.4)                | 202 (7.3)            | 215 (7.0)                                 | 427 (8.8)                          | 529 (8.7)                |
| Bedroom orientation, Backyard        | 152 (63.1) <sup>h</sup> | 1607 (58.2)          | 1759 (58.6) <sup>g</sup>                  | 2258 (57.1) <sup>h</sup>           | 2878 (57.4) <sup>h</sup> |
| Close window at night, Yes           | 51 (21.0) <sup>h</sup>  | 621 (22.5)           | 672 (22.4) <sup>g</sup>                   | 891 (22.6) <sup>h</sup>            | 1111 (22.2) <sup>h</sup> |
| Noise annoyance, Yes                 | 108 (47.2)              | 1588 (57.2)          | 1696 (56.5) <sup>g</sup>                  | 2239 (56.6) <sup>h</sup>           | 2831 (56.3) <sup>h</sup> |
| CVD medication, Yes                  | 93 (31.7)               | 835 (30.1)           | 928 (30.2)                                | 1375 (28.5)                        | 1442 (23.7)              |
| CVD, Yes                             | 123 (42.0)              | 1090 (39.3)          | 1213 (39.6)                               | 1913 (41.2) <sup>g</sup>           | 2072 (35.4) <sup>g</sup> |

<sup>a</sup>Median (interquartile range); <sup>b</sup>Annual average noise levels for the 24h with + 5 dB and + 10dB penalties for the evening and night, respectively; <sup>c</sup>Total noise intermittency ratio; <sup>d</sup>Total number of noise events; <sup>e</sup>Annual average noise levels for the night-time (11pm-7am); <sup>f</sup>Annual average noise levels for the day-time (7am-11pm); <sup>g</sup>< 4% missing observations <sup>h</sup>< 20% missing observations; <sup>i</sup>< 31% missing observations. Cells without missing footnote have < 1% missing observations.

Table S3. Associations of annual average transportation noise levels (Lden) and total noise intermittency ratio (IR) with arterial stiffness, expressed per 10 dB or 10 % change in IR,

| Noise indicators    | Single-exposure models | Multi-exposure model A | Multi-exposure model B | Multi-exposure model C |
|---------------------|------------------------|------------------------|------------------------|------------------------|
|                     | % (95%CI)              | % (95%CI)              | % (95%CI)              | % (95%CI)              |
| Lden, aircraft      | -0.27 (-1.64, 1.11)    | -0.42 (-1.80, 0.97)    | -0.39 (-1.78, 1.00)    | -0.32 (-1.71, 1.08)    |
| Lden, railway       | 1.08 (0.39, 1.78)**    | 1.08 (0.38, 1.78)**    | 1.15 (0.44, 1.86)**    | 1.17 (0.47, 1.87)**    |
| Lden, road          | 0.18 (-0.47, 0.83)     | 0.15 (-0.50, 0.80)     | 0.23 (-0.44, 0.89)     | 0.22 (-0.43, 0.88)     |
| IR <sub>night</sub> | -0.03 (-0.26, 0.21)    | -                      | -0.12 (-0.36, 0.13)    | -                      |
| IR <sub>day</sub>   | -0.14 (-0.33, 0.06)    | -                      | -                      | -0.18 (-0.38, 0.01)*   |

respectively, instead of IQRs (n=2775).

Single-exposure models include one noise indicator at a time. Multi-exposure models include all noise indicators. All linear mixed models were adjusted for sex, age, sex×age, education, smoking status, pack-years smoked, secondary smoke, alcohol consumption, diet, body mass index (BMI), BMI<sup>2</sup>, physical activity, mean arterial pressure (MAP), MAP×sex, nitrogen dioxide, noise truncation indicators, and a random intercept by study area. \*p-value<0.1, \*\*p-value<0.05.

Table S4. Association of annual average transportation noise levels (Lden), total day-time noise intermittency ratio (IR<sub>day</sub>), and total number of day-time noise events (NE<sub>day</sub>) with arterial stiffness (n=2775).

|                                    | Single-exposure models | Multi-exposure model A | Multi-exposure model B | Multi-exposure model C |
|------------------------------------|------------------------|------------------------|------------------------|------------------------|
| Noise variables                    | % (95%CI)              | % (95%CI)              | % (95%CI)              | % (95%CI)              |
| Lden, road                         | 0.19 (-0.50, 0.88)     | 0.16 (-0.53, 0.85)     | 0.24 (-0.46, 0.93)     | -0.04 (-1.04, 0.96)    |
| Lden, railway                      | 0.87 (0.31, 1.43)**    | 0.87 (0.31, 1.43)**    | 0.94 (0.37, 1.50)**    | 0.93 (0.36, 1.49)**    |
| Lden, aircraft                     | -0.21 (-1.30, 0.88)    | -0.33 (-1.43, 0.77)    | -0.25 (-1.35, 0.85)    | -0.32 (-1.42, 0.78)    |
| IR <sub>day</sub>                  | -0.52 (-1.31, 0.26)    | -                      | -0.74 (-1.54, 0.05)*   | -                      |
| NE <sub>day</sub> , Q1 (0-209)     | Ref.                   | -                      | -                      | Ref.                   |
| NE <sub>day</sub> , Q2 (210-433)   | 0.70 (-0.49, 1.90)     | -                      | -                      | 0.90 (-0.31, 2.11)     |
| NE <sub>day</sub> , Q3 (434-1079)  | 0.95 (-0.25, 2.16)     | -                      | -                      | 1.14 (-0.20, 2.48)*    |
| NE <sub>day</sub> , Q4 (1080-5572) | 0.56 (-0.73, 1.84)     | -                      | -                      | 0.77 (-1.04, 2.57)     |

Single-exposure models include one noise indicator at a time. Multi-exposure models include all noise indicators. Multi-exposure model A includes all source-specific Lden levels; model B = model A+IR; model C = model A + NE. All percent changes are per IQR of the respective noise indicator (road: 10.6 dB, railway: 8.1 dB, aircraft: 8 dB, IR day: 40.3%), or quartile for NE. All linear mixed models were adjusted for sex, age, sex×age, education, smoking status, pack-years smoked, secondary smoke, alcohol consumption, diet, body mass index (BMI), BMI<sup>2</sup>, physical activity, mean arterial pressure (MAP), MAP×sex, nitrogen dioxide, noise truncation indicators, and a random intercept by study area. \*p-value<0.1, \*\*p-value<0.05.

Table S5. Sensitivity analyses for the association between annual average transportation noise levels (Lden) and arterial stiffness (baPWV) applying inverse probability weighting for participation selection bias, or excluding non-movers, or participants with hearing impairment, or with CVD.

| Models                         | Lden, road          | Lden, railway       | Lden, aircraft      |
|--------------------------------|---------------------|---------------------|---------------------|
|                                | % (95%CI)           | % (95%CI)           | % (95%CI)           |
| All (n=2775)                   | 0.16 (-0.53, 0.85)  | 0.87 (0.31, 1.43)** | -0.33 (-1.43, 0.77) |
| IPW (n=2754)                   | 0.40 (-0.35, 1.14)  | 1.21 (0.32, 2.09)** | -0.09 (-0.02, 0.08) |
| Non-movers (n=1850)            | 0.31 (-0.58, 1.20)  | 0.86 (0.19, 1.53)** | 0.19 (-1.19, 1.56)  |
| No hearing impairment (n=1995) | -0.06 (-0.88, 0.77) | 0.92 (0.26, 1.58)** | -0.11 (-1.45, 1.24) |
| No CVD (n=1684)                | 0 (-0.85, 0.84)     | 0.89 (0.17, 1.61)** | -0.62 (-1.99, 0.75) |

All percent changes are per IQR of the respective noise indicator (road: 10.6 dB, railway: 8.1 dB, aircraft: 8 dB). Multi-exposure linear mixed models were adjusted for all transportation noise sources, their noise truncation indicators, sex, age, sex×age, education, smoking status, pack-years smoked, secondary smoke, alcohol consumption, diet, body mass index (BMI), BMI<sup>2</sup>, physical activity, mean arterial pressure (MAP), MAP×sex, nitrogen dioxide, and a random intercept by study area. <sup>a</sup>Lday and Lnight are truncated at 30 dB (aircraft and railway) and 35 dB (road) for direct comparison with Lden. \*p-value < 0.1, \*\* p-value < 0.05.



Table S6. Median source-specific noise levels and interquartile ranges in the entire sample, and percentage of noise exposed by groups of potential effect modifiers (n=2775).

| Variable                                | Lden, road |              | Lden, railway |              | Lden, aircraft |              |
|-----------------------------------------|------------|--------------|---------------|--------------|----------------|--------------|
|                                         | % Exposed  | Median (IQR) | % Exposed     | Median (IQR) | % Exposed      | Median (IQR) |
| Male                                    | 99.6       | 53.8 (10.6)  | 43.8          | 30.0 (7.7)   | 57.0           | 32.2 (7.8)   |
| Female                                  | 99.7       | 54.6 (10.7)  | 45.3          | 30.0 (8.5)   | 58.2           | 33.4 (8.2)   |
| Day sleepiness, < p50                   | 99.7       | 54.3 (10.9)  | 44.5          | 30.0 (8.2)   | 56.0           | 31.9 (8.0)   |
| ≥ p50                                   | 99.7       | 54.0 (10.1)  | 44.7          | 30.0 (8.0)   | 59.2           | 34.1 (8.0)   |
| Noise annoyance, < p75                  | 99.6       | 52.3 (9.2)   | 43.4          | 30.0 (7.4)   | 58.6           | 32.5 (7.6)   |
| ≥ p75                                   | 99.9       | 58.8 (10.3)  | 47.1          | 30.0 (9.8)   | 55.6           | 33.4 (8.4)   |
| Noise sensitivity, < p50                | 99.6       | 54.3 (10.4)  | 44.7          | 30.0 (8.4)   | 55.9           | 32.2 (8.1)   |
| ≥ p50                                   | 99.6       | 53.9 (10.7)  | 42.4          | 30.0 (7.5)   | 56.0           | 31.8 (7.1)   |
| IR <sub>night</sub> <sup>a</sup> , ≤ 40 | 100        | 52.5 (9.8)   | 47.3          | 30.0 (6.9)   | 63.0           | 35.5 (8.1)   |
| 40.1-60                                 | 99.6       | 53.5 (11.2)  | 44.0          | 30.0 (8.3)   | 61.1           | 34.5 (7.2)   |
| 60.1-80                                 | 99.7       | 53.9 (11.5)  | 37.9          | 30.0 (5.8)   | 56.5           | 31.9 (7.8)   |
| > 80                                    | 99.6       | 55.3 (9.9)   | 50.7          | 30.2 (13.0)  | 55.1           | 31.2 (10.7)  |
| Rural area                              | 99.3       | 53.2 (10.3)  | 36.3          | 30.0 (6.2)   | 37.8           | 30.0 (1.8)   |
| Urban area                              | 99.9       | 54.9 (10.8)  | 49.8          | 30.0 (8.8)   | 70.2           | 36.2 (14.6)  |
| Bedroom orientation, Street             | 99.7       | 55.6 (10.3)  | 41.2          | 30.0 (7.9)   | 54.9           | 31.2 (6.8)   |
| Backyard                                | 99.6       | 53.1 (10.8)  | 47.0          | 30.0 (8.3)   | 59.4           | 34.4 (8.8)   |
| Closing windows, No                     | 99.6       | 53.5 (10.4)  | 45.6          | 30.0 (8.2)   | 59.5           | 33.6 (8.1)   |
| Yes                                     | 99.8       | 56.8 (11.8)  | 40.6          | 30.0 (7.8)   | 51.9           | 30.9 (6.8)   |

<sup>a</sup> Total night-time noise intermittency ratio

Table S7. Source-specific noise levels for participants exposed to railway noise levels (n=1237, 44.6%) and by intermittency ratio category.

|                                       | Lden, road   | Lden, railway | Lden, aircraft |
|---------------------------------------|--------------|---------------|----------------|
|                                       | median (IQR) | median (IQR)  | median (IQR)   |
| Overall                               | 54.4 (10.6)  | 39.6 (12.1)   | 35.5 (9.4)     |
| IR <sub>night</sub> <sup>a</sup> ≤ 40 | 54.4 (10.0)  | 37.2 (8.0)    | 35.7 (8.1)     |
| 40.1 - 60                             | 53.5 (11.2)  | 39.2 (9.9)    | 35.5 (7.6)     |
| 60.1 - 80                             | 55.0 (11.9)  | 38.1 (10.9)   | 35.7 (11.2)    |
| > 80                                  | 54.2 (9.9)   | 42.7 (17.5)   | 34.6 (15.9)    |

<sup>a</sup> Total night-time noise intermittency ratio

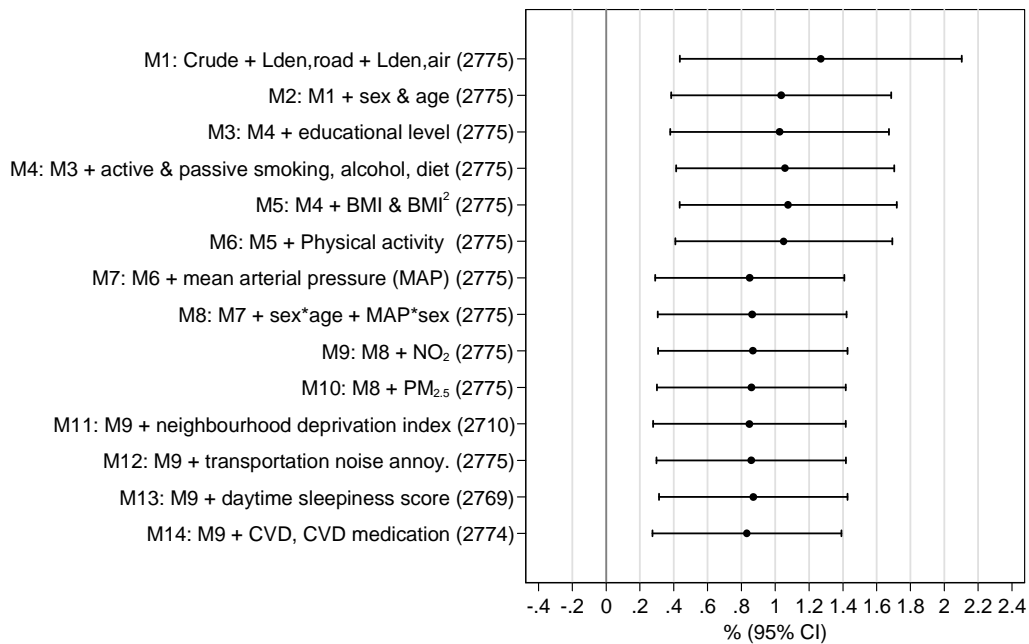

Figure S1. Association between annual average railway noise levels (Lden) and arterial stiffness (baPWV) across different model adjustments. All linear mixed models included a random intercept by study area and the noise truncation indicators. Dot: % change in baPWV per IQR change in Lden (8.1 dB); spikes: 95% confidence interval. M=model (sample size). BMI: Body Mass Index, NO<sub>2</sub>: Nitrogen dioxide, PM<sub>2.5</sub>: particulate matter levels of 2.5 μm; CVD: Cardiovascular Disease.

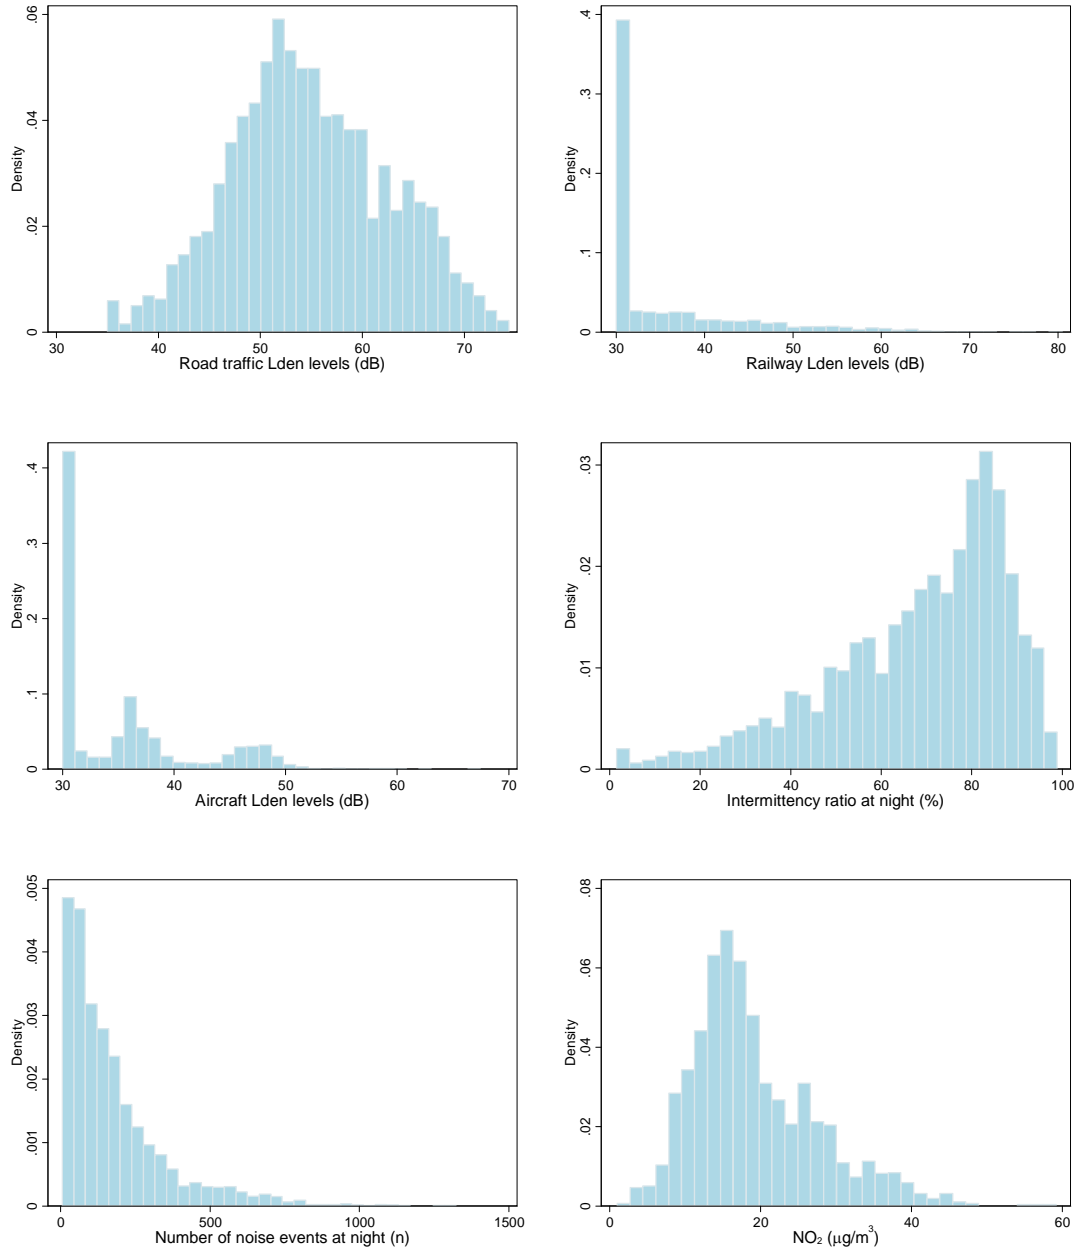

Figure S2: Distribution of the main noise and air pollution indicators in the study sample.

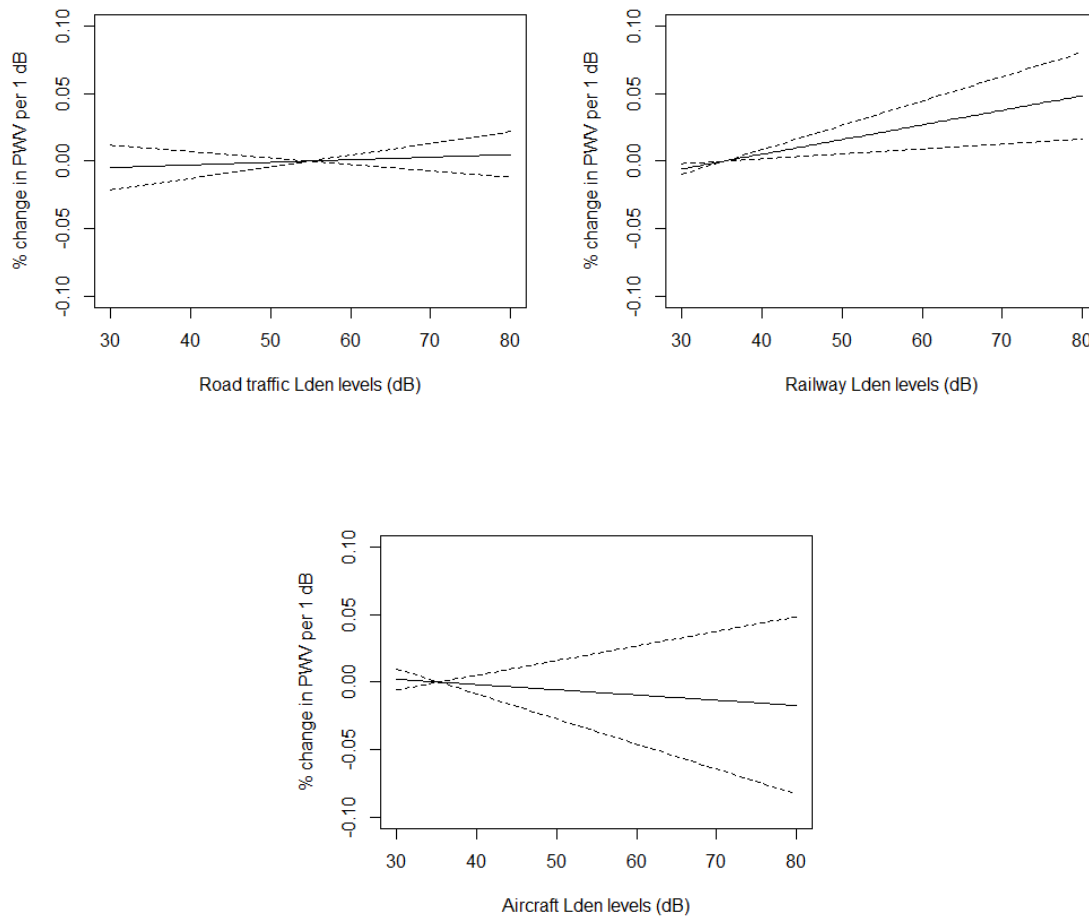

Figure S3. Thin plate penalized smoothing splines for the association between annual average transportation noise levels (Lden) and arterial stiffness (baPWV), per 1 dB. Generalized additive models were adjusted for the complementary Lden sources, their noise truncation indicators, and sex, age, sex×age, education, smoking status, pack-years smoked, secondary smoke, alcohol consumption, diet, body mass index (BMI), BMI<sup>2</sup>, physical activity, mean arterial pressure (MAP), MAP×sex, nitrogen dioxide, and a random intercept by study area.
